# Supplementary material
Source: PubMed Central journal article supplement (PMC4295786)
Supplement: NIHMS535716-supplement-1_si_001.pdf [file NIHMS535716-supplement-1_si_001.pdf]

## SUPPLEMENTAL DATA

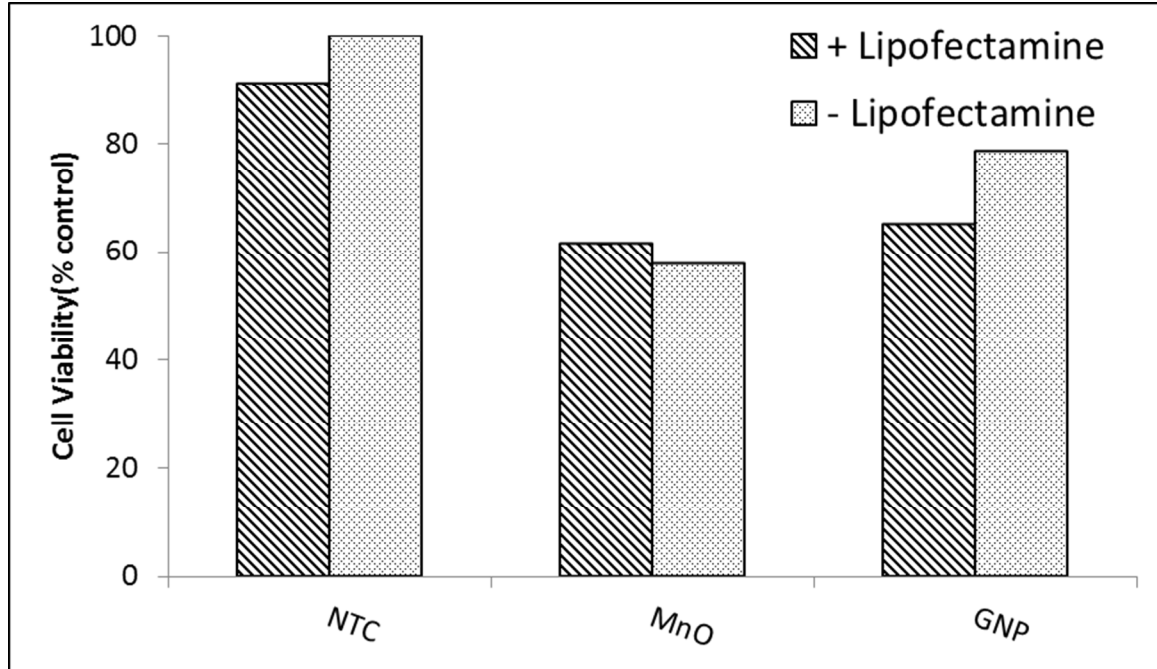

**Supplemental Figure 1.** Cytotoxicity of lipofectamine, MnO, and GNP alone. Cells were treated with either MnO nanoparticles (0.025  $\mu\text{g}/\mu\text{L}$ ) or GNP (5% v/v of 3X stock), or untreated (NTC) +/- Lipofectamine as controls for the data presented in Figure 10. The MTT assay was performed exactly as that represented in Figure 10, and cell viability was again calculated at a percent of the control (NTC - Lipofectamine).
